# Supplementary material for: Unveiling European Cancer Funding: Insights from the European Commission's Cancer Projects Tool
Source: Research Square preprint supplement (doi:10.21203/rs.3.rs-7923090/v1), 2025-10-29

**Additional document 2: *Keyword standardisation- process and methodology***

In response to call for proposals on the EU Funding & Tenders Portal, the applicants assigned between one to fourteen free keywords to their projects proposals. In total, 866 keywords were assigned to all project proposals. Using the ‘remove duplicates’ function in excel, 208 duplicate values were removed from the list, resulting in 657 unique values. Subsequent grouping exercise of the 657 keywords was performed and resulted in 56 standard keywords list. Keywords were grouped based on their synonymous meaning (i.e. cancer and oncology).

The keyword was considered for inclusion in the list of standard keywords if it appeared in at least 3 projects, to allow adequate demonstration of the connections between the projects. Finally, two keywords were removed (‘patients and citizens’ and ‘healthcare’), as they were assigned in more than half of the projects, which would have created too many connections. The list of the final standard keywords (n=56) and the synonyms can be found in Table 1 below). The keywords then were grouped by their meaning into 7 project categories. The process of ‘standard keyword’ list generation is presented in Figure 1 below.

**Table 1: Examples of equivalent terms or synonyms included for the assignment of the standard keywords to the projects**. The standard keywords were assigned based on project title, objective and submitter assigned keywords. Additionally, synonyms of these wordings were used with the AI prompt for keyword assignment.

| Standard Keyword | Synonym |
| --- | --- |
| adolescents | Young adults, adolescent, youth, AYA |
| Artificial Intelligence | AI, machine learning, computer vision, deep learning, federated learning, data analytics |
| biomarkers | Liquid biopsy, biobanks, circulating DNA, metabolites, CA-125, HER2 |
| Blood cancer | Leukemia, AML, CLL, malignancy, hemato-oncology, multiple myeloma |
| Brain cancer | Glioma, glioblastoma, brain cancer |
| Capacity building | Cancer centre, cancer infrastructure, research infrastructure |
| Children | Childhood, paediatric |
| Colorectal cancer | Colon cancer, rectum cancer |
| Communication | Patient advocacy, awareness |
| Cross-bordel health | Cross border access, cross-border healthcare |
| Decision support | Clinical decision support, decision support systems, decision-making, evidence gaps maps, multicriteria decision assessment, evidence-based decision making |
| Data and digital infrastructure | digital platform, digital technologies, data sharing, secondary use of health, federated database network, Data integration, cancer registry, Data collection, Data Governance, data curation, data intermediaries, data paucity, data protection, data quality, European Cancer Information System, registries, data ecosystem, data anonymization, FAIR data, interoperability, Big Data, EHDS data space, data-driven model, digital technologies, metadata, Digital tools, data platform data sharing |
| Education and training | Team training, training, health literacy, knowledge sharing, digital literacy, Digital Skills, digital competences, school |
| e-health | e-Health, telemedicine, Digital medicine, telemonitoring, Digital health, Digitalisation |
| elderly | Older people, geriatric |
| Gastric cancer | Stomach cancer |
| genomics and genetics | Epigenetics, genomics , genetics, Driver mutation, gene therapy, Genetic epidemiology, genetic profiling, genetic testing, genomic data, Next-Generation Sequencing, 5mC, 5hmC |
| Health economics | Cost-effectiveness, economic analyses |
| Health Technology Assessment | HTA |
| healthcare | Value-based healthcare, Cancer Care, quality of care, Care paths, care pathways, health care models, Healthcare transitional care, optimised care, patient-centered care, personalised care, quality of care ,continuum of care, access to care |
| healthy lifestyle | healthy eating, healthy activities, healthy survivorship |
| Helicobacter pylori | H.pylori |
| Hepatitis | Hepatitis C virus, hepatitis B virus, HBV, HCV, viral hepatitis |
| HPV | HPV infection, Human Papilloma Virus |
| immunotherapy | cancer immunotherapy, Immunotherapy using DC vaccination, adoptive cell therapy, CAR-T cells, Cellular Therapies, immunotheraphy, CAR T |
| implementation science | Implementation, implementation evaluation, implementation research |
| inequalities | Inequalities, health inequalities, socioeconomic inequalities, equal access in EU healthcare, reducing inequalities, cancer inequalities, health disparities, health equity, Maturity Model, Inequalities, Cancer Inequalities Registry |
| liver cancer | Hepatocarcinoma, hepatocellular carcinoma, hepatoblastoma |
| medical imaging | CT, CT scans, FDG-PET, low-dose computed tomography, Imaging optimisation and standardisation, radiomics, computer, tomography, medical imaging, Multimodal imaging, Hyperspectral imaging, image analysis, Radiology, Radio-multiomics |
| mental health | Wellbeing, Psychometric validation, Emotional management |
| network | network of experts, Youth network, European Reference Network, CCC |
| OMICS techniques | multi-omics, proteomics, microbiome, microbiomes, Spatial multiomics to map tumour host interactions, transcriptomics, volatilomics, radiomics, radimultiomics |
| Other NCDs | Diabetes, NCDs, cardiovascular disease, Non-communicable diseases, cardiac diseases |
| palliative care | supportive care, Central Pain Modulation |
| participatory approach | Advocacy, Shared decision making, co-creation, co-decision-making, Co-design, collaboration, cooperation, participation, living labs, patient expert patient, advocacy, patient empowernment, patient engagement, Participatory research |
| Patient centricity | Patient Reported Outcome, patient-reported outcomes, patient centricity, Electronic patient reported outcome measures (ePROMs), , patient values, Patient preferences, Patient perception, patient-centered care |
| personalised | Personalised adjuvant therapy, Personalised care, personalised communication, Personalised exercise, personalised health recommendations, Personalized care, personalized communication, Personalized surgery, personalized treatment, personalised medicine |
| Physical activity | Exercise, Sport, outdoor activity, Fitness, personalised exercise |
| Policy and guidance | Policy, ECAC, best practice, Cancer-related policies, national cancer control programmes, health interventions, Standard of Care, Guidelines, reccomendations, evidence-based guidelines, Policy implementation, European Guidelines, European Code against Cancer, EU policies, personalised health recommendations, policy tool, public health recommendations, health promotion, Health promoting schools, Occupation, health surveillance |
| prognosis | Prognostic modelling, prognostic |
| rare cancers | Rare haematological disorders, sarcoma |
| Research and innovation | research and clinical trials, Pragmatic trials, Clinical trial, Cancer research, Innovation research, clinical innovation, Pragmatic Clinical trial, pragmatic trial , prospective randomized pragmatic clinical trial, cancer research, health research |
| Risk factors | Alcohol, healthy environment, Cancer risk factors, determinants of health, Diet, Disease determinants, Environmental determinants, food, health determinants, life style factors, Nutrition, Nutritional pollution, Secondhand smoke, Smoking, Sun exposure, Risk Factors Toolbox, exposome, EMF, 5G networks |
| Risk stratification | risk assessment, at-risk populations, risk-stratification, risk identification, risk-reducing surgery, Risk-reduction |
| Skin cancer | melanoma |
| socioeconomic | Socioeconomic, legal and socio-economic aspects, Gender and age in cancer, education level |
| surgery | Debulking surgery, mastectomy, risk-reducing surgery |
| survival | Youth cancer survivors, survivorship |
| vaccination | Vaccine, vaccines, HPV vaccination, immunisation, Vaccination Coverage, Immunotherapy using DC vaccination, mucosal vaccination |
| Vulnerable group | Vulnerable, Disability, displaced UA people, hard-to-reach population, migrants, Ukraine |
| workforce | cancer workforce, Oncology Specialists, worker |

Note:

1. any standard keywords that are not presented in this table had no equivalent words used for keywords assignment. The additional keywords were: **cervical cancer, bladder cancer,** **breast cancer, pancreatic cancer, prostate cancer.**
2. The presented related words are examples of original keywords submitted to the portal by the project submitters, or equivalent words.

**Figure 1. Graphical representation of a 3-step process of the standard keyword list generation based on keywords assigned to 138 cancer projects during project proposal submission.**


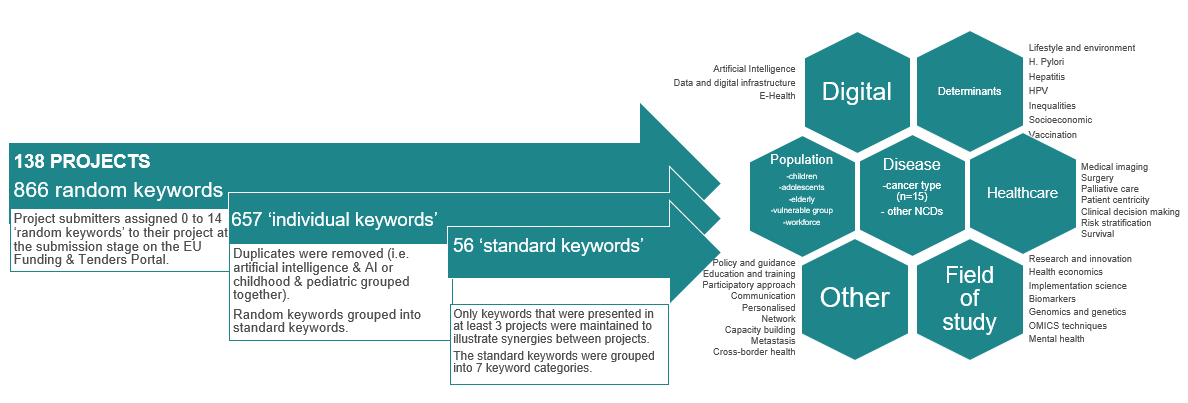

Supplement: Supplementary file 3 [file 4b156b70089174db67d28192.docx]
