# Supplementary material for: Unveiling European Cancer Funding: Insights from the European Commission's Cancer Projects Tool
Source: Research Square preprint supplement (doi:10.21203/rs.3.rs-7923090/v1), 2025-10-29
Supplement: Supplementary file 1 [file 27816a181a03a5130be4a135.docx]

**Additional document 5. Keyword count representing the number of projects for which the keyword was assigned**

| **Keyword** | **Projects** |
| --- | --- |
| policy and guidance | 42 |
| data and digital infrastructure | 36 |
| participatory approach | 36 |
| implementation science | 36 |
| education and training | 32 |
| network | 32 |
| lifestyle and environment | 29 |
| research and innovation | 27 |
| inequalities | 24 |
| Artificial Intelligence | 21 |
| survival | 18 |
| communication | 18 |
| health economics | 18 |
| capacity building | 17 |
| children | 16 |
| personalised | 16 |
| genomics and genetics | 15 |
| adolescents | 14 |
| breast cancer | 14 |
| biomarkers | 14 |
| medical imaging | 13 |
| patient-centricity | 12 |
| vulnerable group | 10 |
| OMICS techniques | 9 |
| colorectal cancer | 9 |
| surgery | 9 |
| mental health | 9 |
| risk stratification | 8 |
| clinical decision making | 8 |
| therapy | 7 |
| cervical cancer | 7 |
| HPV | 7 |
| e-health | 7 |
| lung cancer | 6 |
| blood cancer | 6 |
| metastasis | 6 |
| other NCDs | 6 |
| socioeconomic | 5 |
| Health Technology Assessment | 5 |
| liver cancer | 4 |
| gastric cancer | 4 |
| vaccination | 4 |
| rare cancers | 4 |
| brain cancer | 3 |
| hepatitis | 3 |
| palliative care | 3 |
| workforce | 3 |
| pancreatic cancer | 2 |
| Helicobacter pylori | 2 |
| prostate cancer | 2 |
| ovarian cancer | 2 |
| cross-border health | 2 |
| bladder cancer | 1 |
| skin cancer | 1 |
| elderly | 1 |
| kidney cancer | 1 |
