# Supplementary material for: Unveiling European Cancer Funding: Insights from the European Commission's Cancer Projects Tool
Source: Research Square preprint supplement (doi:10.21203/rs.3.rs-7923090/v1), 2025-10-29
Supplement: Supplementary file 2 [file 4a06b9b0ff3f93b5bb3e66b9.docx]

**Additional document 6. Number of projects per country (including associated and candidate countries) and the rate of projects per capita and per GDP per capita**.**

| **Country** | **number projects involved** | **GDP per Capita (2023, current US$)** | **Rate (projects per 1,000 US$)** | **Total Population (2023, thousands)** | **Rate (project per million)** |
| --- | --- | --- | --- | --- | --- |
| Spain | 253 | 33,509.00 | **7.55** | 48,347.91 | 5.2 |
| Italy | 230 | 39,003.30 | **5.90** | 58,993.47 | 3.9 |
| Belgium | 197 | 54,700.90 | 3.60 | 11,787.42 | 16.7 |
| Germany | 162 | 54,343.20 | 2.98 | 83,280.00 | 1.9 |
| France | 153 | 44,690.90 | 3.42 | 68,287.49 | 2.2 |
| Greece | 113 | 23,400.70 | 4.83 | 10,405.59 | 10.9 |
| Netherlands | 110 | 64,572.00 | 1.70 | 17,877.12 | 6.2 |
| Sweden | 82 | 55,516.80 | 1.48 | 10,536.63 | 7.8 |
| Romania | 70 | 18,404.30 | 3.80 | 19,059.48 | 3.7 |
| Portugal | 68 | 27,331.20 | 2.49 | 10,578.17 | 6.4 |
| Austria | 66 | 56,033.60 | 1.18 | 9,131.76 | 7.2 |
| Lithuania | 64 | 27,786.00 | 2.30 | 2,871.59 | 22.3 |
| Ireland | 63 | 103,887.80 | 0.61 | 5,307.60 | 11.9 |
| Poland | 59 | 22,056.70 | 2.67 | 36,687.35 | 1.6 |
| Slovenia | 58 | 32,610.10 | 1.78 | 2,120.46 | 27.4 |
| Denmark | 45 | 68,453.90 | 0.66 | 5,946.95 | 7.6 |
| Norway | 41 | 87,925.10 | 0.47 | 5,519.59 | 7.4 |
| Hungary | 41 | 22,141.90 | 1.85 | 9,592.19 | 4.3 |
| Luxembourg | 37 | 128,678.20 | 0.29 | 666.43 | 55.5 |
| Finland | 37 | 52,925.70 | 0.70 | 5,583.91 | 6.6 |
| Estonia | 36 | 30,133.30 | 1.19 | 1,370.29 | 26.3 |
| Cyprus | 33 | 36,551.40 | 0.90 | 1,344.98 | 24.5 |
| Czech Republic | 33 | 31,591.20 | 1.04 | 10,864.04 | 3.0 |
| Croatia | 30 | 21,865.50 | 1.37 | 3,859.69 | 7.8 |
| United Kingdom | 29 | 49,463.90 | 0.59 | 68,350.00 | 0.4 |
| Switzerland | 24 | 99,564.70 | 0.24 | 8,888.09 | 2.7 |
| Latvia | 24 | 22,502.80 | 1.07 | 1,877.44 | 12.8 |
| Bulgaria | 22 | 15,885.50 | 1.38 | 6,446.60 | 3.4 |
| Israel | 19 | 52,642.40 | 0.36 | 9,756.60 | 1.9 |
| Slovakia | 18 | 24,491.40 | 0.73 | 5,426.74 | 3.3 |
| Ukraine | 18 | 5,069.70 | **3.55** | 37,732.84 | 0.5 |
| Malta | 13 | 40,395.80 | 0.32 | 552.75 | 23.5 |
| Iceland | 9 | 79,637.00 | 0.11 | 393.35 | 22.9 |
| Moldova | 6 | 6,729.40 | 0.89 | 2,457.78 | 2.4 |
| Turkey | 4 | 13,105.70 | 0.31 | 85,325.96 | 0.0 |
| Canada | 3 | 53,431.20 | 0.06 | 40,097.76 | 0.1 |
| Serbia | 3 | 12,281.50 | 0.24 | 6,623.18 | 0.5 |
| Australia | 2 | 64,820.90 | 0.03 | 26,658.95 | 0.1 |
| Bosnia and Herzegovina | 2 | 8,638.70 | 0.23 | 3,185.07 | 0.6 |
| North Macedonia | 2 | 8,624.30 | 0.23 | 1,827.82 | 1.1 |
| Montenegro | 1 | 12,221.50 | 0.08 | 616.18 | 1.6 |
| Albania | 1 | 8,575.20 | 0.12 | 2,745.97 | 0.4 |

**data extracted from World Bank, accessed June 2025, <https://data.worldbank.org/indicator/NY.GDP.PCAP.CD?view=chart>
