# Supplementary material for: Unveiling European Cancer Funding: Insights from the European Commission's Cancer Projects Tool
Source: Research Square preprint supplement (doi:10.21203/rs.3.rs-7923090/v1), 2025-10-29
Supplement: Supplementary file 4 [file 75b1a3f0f37da25cbfe5dfa3.docx]

**Additional Document 4. EU financial contribution (EC contribution and total cost of the projects) by funding programme and project type**

| **Programme** | **Funding type** | **n projects** | **European Commission contribution** | **Total PROJECT COST** | **%** | **range** |
| --- | --- | --- | --- | --- | --- | --- |
| EU4Health | | 54 | EUR 353,492,917.7 | EUR 446,711,493.0 | 79.1 | 60-100% |
|  | Joint Actions | 10 | EUR 253,916,777.7 | EUR 317,535,936.5 | 80.0 | 80 |
|  | Open calls | 37 | EUR 92,311,173.2 | EUR 119,790,589.8 | 77.1 | 60-80 |
|  | European Reference Networks (ERNs) | 4 | EUR 4,084,966.8 | EUR 4,084,966.8 | 100.0 | 100 |
|  | Direct grants | 3 | EUR 3,180,000.0 | EUR 5,300,000.0 | 60.0 | 60 |
| Horizon Europe Mission on Cancer | | 47 | EUR 358,987,575.1 | EUR 360,388,596.5 | 99.6 | 83-100% |
| DIGITAL |  | 1 | EUR 17,789,829.0 | EUR 35,579,658.2 | 50.0 | na |
