# Supplementary material for: Unveiling European Cancer Funding: Insights from the European Commission's Cancer Projects Tool
Source: Research Square preprint supplement (doi:10.21203/rs.3.rs-7923090/v1), 2025-10-29

**Additional Document 1: Prompt Engineering**

Artificial Intelligence (AI) prompt engineering was used in keyword extraction and objective analysis to do the identification and mapping of source keywords within the text of the objectives, returning structured JSON (JavaScript Object Notation) format results with original and processed keyword lists. For the exercise we use the API (Application Programming Interface) of Anthropic Claude 3.7 Sonnet model through European Amazon Bedrock cloud provider endpoints.


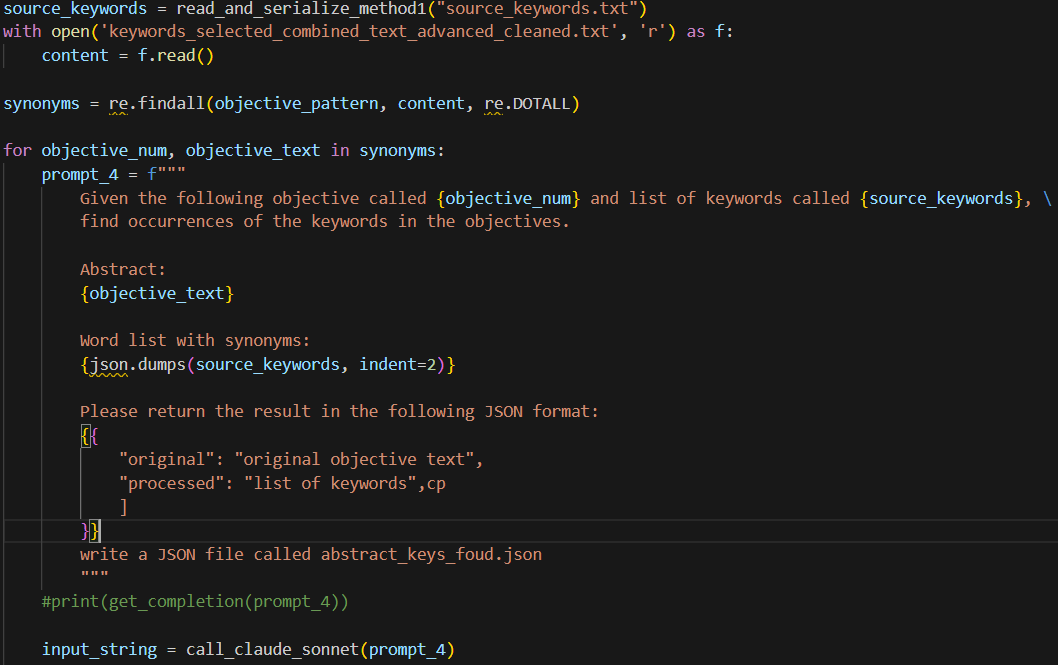

Supplement: Supplementary file 6 [file 8bf081d7b5991e946f25e823.docx]
