# Supplementary material for: Unveiling European Cancer Funding: Insights from the European Commission's Cancer Projects Tool
Source: Research Square preprint supplement (doi:10.21203/rs.3.rs-7923090/v1), 2025-10-29
Supplement: Supplementary file 7 [file c23d816c1892f033d4052d00.docx]

**Additional document 7. Collaborations between the institutions participating in the projects presented in the Cancer Projects Tool**

| **Institution 1** | **Institution 2** | **Number of connections** |
| --- | --- | --- |
| MINISTERU GHAS-SAHHA U L-ANZJANITA ATTIVA (MT) | SCIENSANO (BE) | 12 |
| ONKOLOSKI INSTITUT LJUBLJANA (SI) | SCIENSANO (BE) | 10 |
| NACIONALINIS VEZIO INSTITUTAS (LT) | Orszagos Onkologiai Intezet (HU) | 10 |
| INSTITUT CATALA D'ONCOLOGIA (ES) | INSTITUTUL ONCOLOGIC PROF DR ION CHIRICUTA CLUJ-NAPOCA (RO) | 9 |
| INSTITUT CATALA D'ONCOLOGIA (ES) | NACIONALINIS VEZIO INSTITUTAS (LT) | 9 |
| INSTITUT CATALA D'ONCOLOGIA (ES) | ONKOLOSKI INSTITUT LJUBLJANA (SI) | 9 |
| INSTITUT CATALA D'ONCOLOGIA (ES) | SCIENSANO (BE) | 9 |
| LIETUVOS SVEIKATOS MOKSLU UNIVERSITETO LIGONINE KAUNO KLINIKOS (LT) | MINISTERIO DA SAUDE (PT) | 9 |
| MINISTERU GHAS-SAHHA U L-ANZJANITA ATTIVA (MT) | ONKOLOSKI INSTITUT LJUBLJANA (SI) | 9 |
| INSTITUT CATALA D'ONCOLOGIA (ES) | NARODOWY INSTYTUT ONKOLOGII IM. MARII SKLODOWSKIEJ-CURIE -PANSTWOWY INSTYTUT BADAWCZY (PL) | 9 |
| MINISTERU GHAS-SAHHA U L-ANZJANITA ATTIVA (MT) | NARODOWY INSTYTUT ONKOLOGII IM. MARII SKLODOWSKIEJ-CURIE -PANSTWOWY INSTYTUT BADAWCZY (PL) | 9 |
| MINISTERU GHAS-SAHHA U L-ANZJANITA ATTIVA (MT) | Orszagos Onkologiai Intezet (HU) | 9 |
| MINISTERU GHAS-SAHHA U L-ANZJANITA ATTIVA (MT) | VIESOJI ISTAIGA VILNIAUS UNIVERSITETO LIGONINE SANTAROS KLINIKOS (LT) | 9 |
| NARODOWY INSTYTUT ONKOLOGII IM. MARII SKLODOWSKIEJ-CURIE -PANSTWOWY INSTYTUT BADAWCZY (PL) | Orszagos Onkologiai Intezet (HU) | 9 |
| NARODOWY INSTYTUT ONKOLOGII IM. MARII SKLODOWSKIEJ-CURIE -PANSTWOWY INSTYTUT BADAWCZY (PL) | SCIENSANO (BE) | 9 |
| INSTITUT NATIONAL DU CANCER GIP (FR) | SCIENSANO (BE) | 9 |
| Orszagos Onkologiai Intezet (HU) | SCIENSANO (BE) | 9 |
| INSTITUTO PORTUGUES DE ONCOLOGIA DO PORTO FRANCISCO GENTIL, EPE (PT) | NARODOWY INSTYTUT ONKOLOGII IM. MARII SKLODOWSKIEJ-CURIE -PANSTWOWY INSTYTUT BADAWCZY (PL) | 9 |
| SCIENSANO (BE) | VIESOJI ISTAIGA VILNIAUS UNIVERSITETO LIGONINE SANTAROS KLINIKOS (LT) | 9 |
